# Supplementary material
Source: PubMed Central journal article supplement (PMC4598392)
Supplement: IAI.00762-15_zii999091460so1.pdf [file IAI.00762-15_zii999091460so1.pdf]

**Table S1.** Plasmids

| Plasmid   | Description                                                                                                                                              | Source     |
|-----------|----------------------------------------------------------------------------------------------------------------------------------------------------------|------------|
| pHSS6-GCU | Vector containing gonococcal uptake sequence (Kan <sup>r</sup> )                                                                                         | (1)        |
| pUNCH412  | FA19 <i>tbpA</i> in pET-11                                                                                                                               | (2)        |
| pUNCH755  | Vector containing truncated and nonfunctional <i>tbpB</i> gene, full length <i>tbpA</i> gene, and <i>tbpA</i> downstream region with an mTn3Cm insertion | (3)        |
| pVCU150   | pHSS6-GCU containing <i>tbpA</i> gene with K351A mutation, novel silent BamHI site at <i>tbpA</i> bp 1488-1493, and no stop codon                        | This study |
| pVCU151   | pHSS6-GCU containing <i>tbpA</i> gene with D355A mutation, novel silent BamHI site at <i>tbpA</i> bp 1488-1493, and no stop codon                        | This study |
| pVCU152   | pHSS6-GCU containing <i>tbpA</i> gene with D355K mutation, novel silent BamHI site at <i>tbpA</i> bp 1488-1493, and no stop codon                        | This study |
| pVCU153   | pHSS6-GCU containing <i>tbpA</i> gene with N357A mutation, novel silent BamHI site at <i>tbpA</i> bp 1488-1493, and no stop codon                        | This study |
| pVCU154   | pHSS6-GCU containing <i>tbpA</i> gene with Q358A mutation, novel silent BamHI site at <i>tbpA</i> bp 1488-1493, and no stop codon                        | This study |
| pVCU155   | pHSS6-GCU containing <i>tbpA</i> gene with K359A mutation, novel silent BamHI site at <i>tbpA</i> bp 1488-1493, and no stop codon                        | This study |
| pVCU156   | pHSS6-GCU containing <i>tbpA</i> gene with K359E mutation, novel silent BamHI site at <i>tbpA</i> bp 1488-1493, and no stop codon                        | This study |
| pVCU157   | pHSS6-GCU containing <i>tbpA</i> gene with K359R mutation, novel silent BamHI site at <i>tbpA</i> bp 1488-1493, and no stop codon                        | This study |
| pVCU158   | pHSS6-GCU containing <i>tbpA</i> gene with Q360A mutation, novel silent BamHI site at <i>tbpA</i> bp 1488-1493, and no stop codon                        | This study |
| pVCU159   | pHSS6-GCU containing <i>tbpA</i> gene with Q360E mutation, novel silent BamHI site at <i>tbpA</i> bp 1488-1493, and no stop codon                        | This study |
| pVCU160   | pHSS6-GCU containing <i>tbpA</i> gene with Q360K mutation, novel silent BamHI site at <i>tbpA</i> bp 1488-1493, and no stop codon                        | This study |

|         |                                                                                            |            |
|---------|--------------------------------------------------------------------------------------------|------------|
| pVCU161 | pUNCH755 containing <i>tbpA</i> gene from pVCU150                                          | This study |
| pVCU162 | pUNCH755 containing <i>tbpA</i> gene from pVCU151                                          | This study |
| pVCU163 | pUNCH755 containing <i>tbpA</i> gene from pVCU152                                          | This study |
| pVCU164 | pUNCH755 containing <i>tbpA</i> gene from pVCU153                                          | This study |
| pVCU165 | pUNCH755 containing <i>tbpA</i> gene from pVCU154                                          | This study |
| pVCU166 | pUNCH755 containing <i>tbpA</i> gene from pVCU155                                          | This study |
| pVCU167 | pUNCH755 containing <i>tbpA</i> gene from pVCU156                                          | This study |
| pVCU168 | pUNCH755 containing <i>tbpA</i> gene from pVCU157                                          | This study |
| pVCU169 | pUNCH755 containing <i>tbpA</i> gene from pVCU158                                          | This study |
| pVCU170 | pUNCH755 containing <i>tbpA</i> gene from pVCU159                                          | This study |
| pVCU171 | pUNCH755 containing <i>tbpA</i> gene from pVCU160                                          | This study |
| pVCU172 | pUNCH755 containing <i>tbpA</i> gene with deletion from bp 1453-1488 (loop 3 helix region) | This study |
| pVCU757 | FA 1090 <i>tbpA</i> in pET22b                                                              | This study |

---

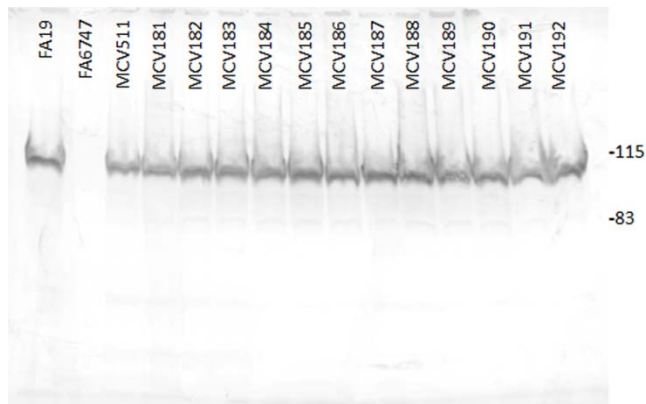

2

3 Fig S1. TbpA expression determination by western blot. WT and mutant gonococci were iron  
4 stressed in liquid CDM for 4 hours, standardized to cell density, pelleted, and lysed. Lysates  
5 were subjected to a bicinchoninic acid assay (Thermo) to assess protein levels, and then evenly  
6 loaded for SDS-PAGE and subsequent transfer to nitrocellulose. Equivalent protein loading was  
7 confirmed by ponceau staining. The western blot was probed with polyclonal TbpA antibody,  
8 and developed with the NBT/BCIP development system (Sigma). TbpA bands are present at 100  
9 kDa.

10

11 **References**

12 1. **Elkins, C, Thomas, CE, Seifert, HS, Sparling, PF.** 1991. Species-specific uptake of DNA by  
13 gonococci is mediated by a 10-base-pair sequence. J. Bacteriol. **173**:3911-3913.

14 2. **Cornelissen, CN, Biswas, GD, Sparling, PF.** 1993. Expression of gonococcal transferrin-binding  
15 protein 1 causes *Escherichia coli* to bind human transferrin. J. Bacteriol. **175**:2448-2450.

16 3. **Anderson, JE, Sparling, PF, Cornelissen, CN.** 1994. Gonococcal transferrin-binding protein 2  
17 facilitates but is not essential for transferrin utilization. J. Bacteriol. **176**:3162-3170.

18
